# Supplementary material
Source: publisher figshare collection journal article supplement (https://acs.figshare.com/ndownloader/files/21814416)
Supplement: Supplementary file 1 [file 21814416]

Compound name,SMILES,SPR affinity for FZD8
carbamazepine,c1ccc2c(c1)C=Cc3ccccc3N2C(=O)N,16.8 �M
